# Supplementary material for: Division of Responsibility in Child Feeding and Eating Competence: A Cross-Sectional Study in a Sample of Caregivers of Brazilian Children with Celiac Disease
Source: MDPI journal article supplement (doi:10.3390/nu16071052), 2024-04-04
Supplement: s1 [file s1]

Table S1. Socio-demographic and health and consumption characteristics (n=50).

|                                             |                       | <b>Sample (N =50)</b> |          |
|---------------------------------------------|-----------------------|-----------------------|----------|
|                                             |                       | <b>freq</b>           | <b>%</b> |
| <b>Gender</b>                               | Female                | 49                    | 98.0%    |
|                                             | Male                  | 1                     | 2.0%     |
| <b>Age</b>                                  | Up to 40 years        | 39                    | 78.0%    |
|                                             | More than 40 years    | 11                    | 22.0%    |
| <b>Schooling level</b>                      | High School           | 7                     | 14.0%    |
|                                             | Undergraduate         | 16                    | 32.0%    |
|                                             | Graduate              | 27                    | 54.0%    |
| <b>Income</b>                               | Up to 2 MW            | 10                    | 20.0%    |
|                                             | 3 – 5 MW              | 14                    | 28.0%    |
|                                             | 6 – 9 MW              | 10                    | 20.0%    |
|                                             | More than 10 MW       | 11                    | 22.0%.   |
|                                             | Prefer not to inform  | 5                     | 10.0%    |
| <b>BMI kg/m<sup>2</sup></b>                 | Low: <18.5            | 2                     | 4.2%     |
|                                             | Normal: 18.5–24.9     | 26                    | 54.2%    |
|                                             | Overweight: 25.0–29.9 | 12                    | 25.0%    |
|                                             | Obesity: $\geq 30$    | 8                     | 16.7%    |
|                                             | Missing               | 2                     | 4.0%     |
| <b>Gluten free diet</b>                     | No                    | 28                    | 56.0%    |
|                                             | Yes                   | 22                    | 44.0%    |
| <b>Children age</b>                         | 2 to 4 years          | 20                    | 40.0%    |
|                                             | 5 to 6 years          | 30                    | 60.0%    |
| <b>Children gender</b>                      | Female                | 32                    | 64.0%    |
|                                             | Male                  | 18                    | 36.0%    |
| <b>Time since CD children diagnosis</b>     | Less than 1 year      | 22                    | 44.0%    |
|                                             | 1 to 3 years          | 17                    | 37.0%    |
|                                             | More than 3 years     | 11                    | 22.0%    |
| <b>Other medical diagnosis</b>              | No                    | 28                    | 56.0%    |
|                                             | Yes                   | 22                    | 44.0%    |
| <b>CD children complying with GFD</b>       | No                    | 9                     | 18.0%    |
|                                             | Yes                   | 41                    | 82.0%    |
| <b>Frequency of family meals</b>            | Sometimes             | 6                     | 12.0%    |
|                                             | Almost always         | 21                    | 42.0%    |
|                                             | Always                | 23                    | 46.0%    |
| <b>Frequency of preparing meals at home</b> | 1 to 3 times per week | 2                     | 4.0%     |
|                                             | 4 to 6 times per week | 13                    | 26.0%    |
|                                             | 7 days per week       | 35                    | 70.0%    |

|                                                                         |                          |    |       |
|-------------------------------------------------------------------------|--------------------------|----|-------|
| <b>Children's<br/>fruits<br/>consumption</b>                            | None                     | 2  | 4.0%  |
|                                                                         | 1 to 2 portions daily    | 34 | 68.0% |
|                                                                         | 3 to 4 portions daily    | 12 | 24.0% |
|                                                                         | 5 ou more portions daily | 2  | 4.0%  |
| <b>Children's<br/>vegetables<br/>consumption</b>                        | None                     | 12 | 24.0% |
|                                                                         | 1 to 2 portions daily    | 36 | 72.0% |
|                                                                         | 3 to 4 portions daily    | 2  | 4.0%  |
| <b>Guided by a<br/>dietitian</b>                                        | No                       | 22 | 44.0% |
|                                                                         | Yes                      | 28 | 56.0% |
| <b>Participating in<br/>celiacs' groups<br/>or associations</b>         | No                       | 8  | 16.0% |
|                                                                         | Yes                      | 42 | 84.0% |
| <b>Another person<br/>at home with<br/>gluten-related<br/>disorders</b> | No                       | 44 | 88.0% |
|                                                                         | Yes                      | 6  | 12.0% |

BMI: body mass index

CD: celiac disease

GFD: gluten-free diet
